# Supplementary material
Source: publisher site journal article supplement (https://content.cld.iop.org/journals/2053-1591/2/9/095901/revision1/supplementary_information.pdf)
Supplement: Supplementary file 1 [file supplementary_information.pdf]

# Synthesis of CdTe QDs by hydro-thermal method, with tunable emission fluorescence

Fujun LIU<sup>1</sup>, Sophie LAURENT<sup>1,2\*</sup>, Luce VANDER ELST<sup>1,2</sup>, Robert N MULLER<sup>1,2</sup>

1. Department of General, Organic and Biomedical Chemistry, NMR and Molecular Imaging Laboratory, University of Mons, B-7000 Mons, Belgium

2. Center for Microscopy and Molecular Imaging (CMMI), B-6041 Charleroi-Gosselies, Belgium

## Supporting Information

### Contents:

|                                                                                                                    |            |
|--------------------------------------------------------------------------------------------------------------------|------------|
| 1. Determination of the concentration of Cd and Te in CdTe QDs                                                     | Page S2-S5 |
| 2. Determination of the quantum yield (QY) of the CdTe QDs                                                         | Page S6    |
| 3. Emission spectra of the CdTe QDs (D=7nm) with different concentrations, with $\lambda_{\text{ex}}=500\text{nm}$ | Page S7    |
| 4 Emission spectra of the CdTe QDs (D=7nm) with different concentrations, with $\lambda_{\text{ex}}=590\text{nm}$  | Page S8    |
| 5. TEM picture of CdTe QDs                                                                                         | Page S8    |
| 6. Photo-stability of as-prepared CdTe QDs ( $\lambda_{\text{ex}}=500\text{ nm}$ )                                 | Page S9    |

### *Determination of the concentration of Cd and Te in CdTe QDs*

A new method, combining absorption spectrum and emission spectrum, was employed to achieve the accurate concentrations of Cd and Te in obtained CdTe QDs. Both  $\text{Cd}^{2+}$  and  $\text{Te}^{+4}$  can react with Rhodamine B (denoted as RhoB) into compounds  $(\text{RhoB})_4[\text{TeI}_8]$  and  $(\text{RhoB})_4[\text{CdI}_6]$  (denoted as Te-RhoB and Cd-RhoB), respectively, with absorption peak at 580nm but with different absorption factors [Rao 1983; Kim 2012; Talio 2012]. Therefore, an equation set was created by fitting the absorption intensity and emission intensity of Cd-RhoB/Te-RhoB solution, to determinate the concentrations for each component. The detailed process was as follows: Te standard solution, 1 mL of 1M  $\text{H}_2\text{SO}_4$ , 0.5 mL of 20% KI and 0.5 mL of 1% polyvinyl alcohol (PVA, Mw=50-85 k) were mixed and shaken up (this mixture is called as Solution 1), and then 0.5 mL of 0.05% rhodamine B was added slowly into Solution 1 and water was added until a constant volume of 10 mL. Five samples were prepared with final Te concentration of 0, 2, 4, 8 and  $10 \times 10^{-6}\text{M}$ . The formation of complex  $(\text{RhoB})_4[\text{TeI}_8]$  was solubilized by PVA. Cd standard solution was treated using the same procedure, with Cd concentrations of 0, 4, 8, 16 and  $20 \times 10^{-6}\text{M}$ . After storing in darkness for 30min, absorptions at 580nm of the samples were measured by UV-Vis, while a solution with the same concentrations of  $\text{H}_2\text{SO}_4$ , KI, PVA and RhoB was used as the background. The fitting of absorption data of Cd-complex and Te-complex are shown in Fig. S1. The intercepts for both fitted equations was fixed at 0.758 (the absorption of the mixture of  $\text{H}_2\text{SO}_4$ , KI, PVA and RhoB, without Cd or Te). The empirical fitting functions of the curves in Fig. S1 are provided as follows:

$$A_{\text{Cd}}=0.758+0.00968[\text{Cd}] \quad (1)$$

$$A_{\text{Te}}=0.758+0.01494[\text{Te}] \quad (2)$$

where  $A_{\text{Cd}}$  and  $A_{\text{Te}}$  are the absorption intensities of Cd-RhoB complex and Te-RhoB complex, respectively, while  $[\text{Cd}]$  and  $[\text{Te}]$  are the concentrations of Cd and Te expressed in micromolar. When combining the two equations Eq (1) and Eq (2), the absorption of a mixture of Cd and Te (A) is assumed to be Eq (3):

$$A=0.758+0.00968[\text{Cd}]+0.01494[\text{Te}] \quad (3)$$

Four samples mixing Cd and Te standard solutions, different  $[\text{Te}]$  and  $[\text{Cd}]$  were measured by UV-Vis to confirm Eq (3), and the results in Table S1 showed that the experimental results match the theoretical values calculated from Eq (3) with very tiny error, by which the assumed equation Eq (3) is proved to be accurate.

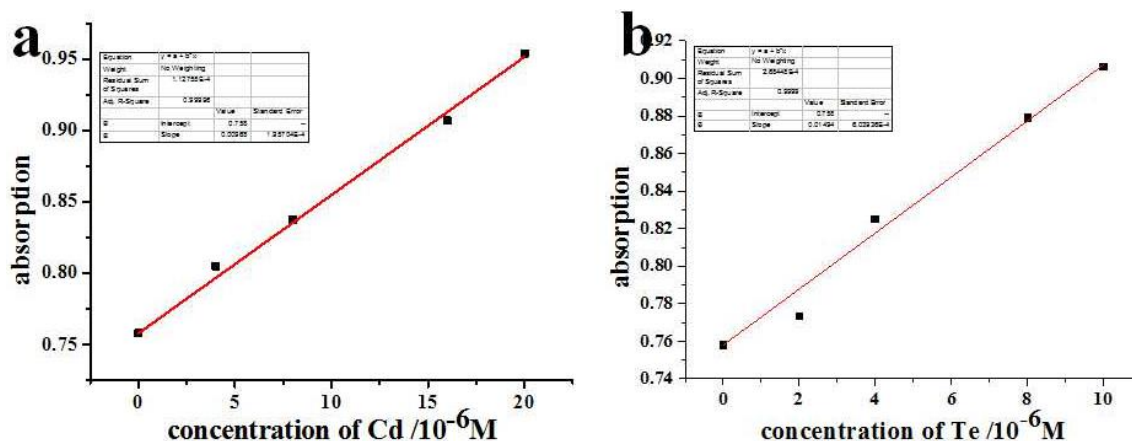

**Fig. S1** Absorption intensity curves for Cd-RhoB complex and Te-RhoB complex.

**Table S1** Verification of the assumed equation Eq (3), where  $A_{exp}$  and  $A_{cal}$  are the experimental absorption and the calculated result from Eq (3), respectively.

| [Cd] / $10^{-6}M$ | [Te] / $10^{-6}M$ | $A_{exp}$ | $A_{cal}$ |
|-------------------|-------------------|-----------|-----------|
| 5                 | 5                 | 0.88134   | 0.8811    |
| 5                 | 10                | 0.96302   | 0.9558    |
| 10                | 5                 | 0.93296   | 0.9295    |
| 10                | 10                | 1.00471   | 1.0042    |

To determine [Cd] and [Te], another equation is needed. Therefore, the fluorescence of above samples was measured to get corresponding Te and Cd standard fluorescence curves. The Cd-RhoB complex and Te-RhoB complex are non-fluorescent, so the decreased RhoB concentration, caused by the presence of Cd or Te, showed weaker fluorescence, compared to the un-treated rhodamine B. The parameters for measurements were excitation wavelength  $\lambda_{ex}=490nm$ , the excitation and emission widths  $s_{ex}=s_{em}=4nm$ . The data for Cd-complex and Te-complex are shown in Fig. S2-a and Fig. S2-b, respectively. The intercepts for both fitted equations was fixed at 162.323 (the fluorescence intensity of rhodamine solution without Cd or Te). The fitting equations for Cd-complex and Te-complex are as follows:

$$Int_{Cd}=162.323-4.18624[Cd] \quad (4)$$

$$Int_{Te}=162.323-4.46689[Te] \quad (5)$$

where  $Int_{Cd}$  and  $Int_{Te}$  are the fluorescence integral intensities of Cd-RhoB complex and Te-RhoB complex, respectively. So intensity for a mixture of Te-complex and Cd-complex is expected to be:

$$\text{Int}=162.323-4.18624[\text{Cd}]-4.46689 [\text{Te}] \quad (6)$$

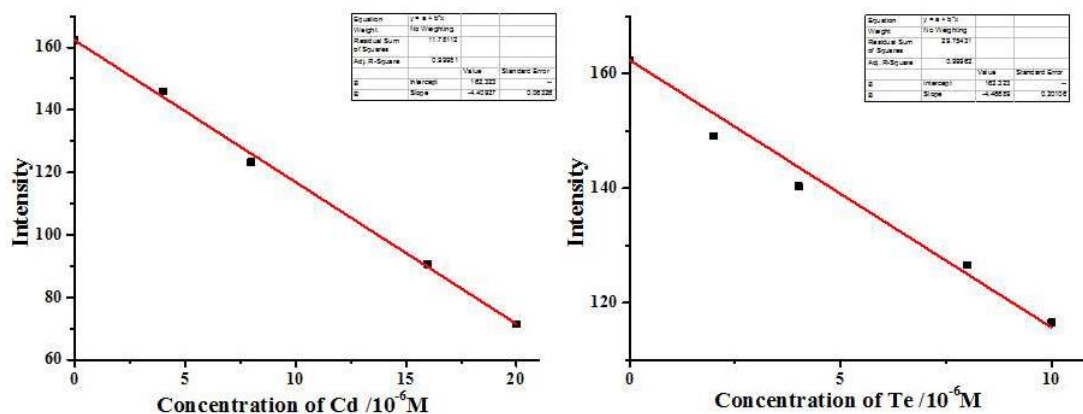

**Fig. S2** Emission intensity curves for Cd-RhoB complex and Te-RhoB complex.

By combining Eq. (3) and Eq. (6), an equation set was obtained to get the values of [Cd] and [Te]:

$$\begin{cases} A=0.758+0.00968[\text{Cd}]+0.01494[\text{Te}] \\ \text{Int}=162.323-4.18624[\text{Cd}]-4.46689 [\text{Te}] \end{cases}$$

To obtain the accurate values of [Cd] and [Te], 1mL CdTe QDs colloid sample was treated by dialysis for 24h, followed by adding 0.3mL H<sub>2</sub>O<sub>2</sub> and 0.6mL HNO<sub>3</sub>, which was subsequently treated by the microwave digestion. The obtained liquid was collected into a volumetric flask and distilled water added to make the total volume equal 10mL. 0.5mL of this solution was mixed with 1mL of 1M H<sub>2</sub>SO<sub>4</sub>, 0.5mL of 20% KI and 1mL 1% PVA (Mw=50-85kDa) and shaken up. Then 0.5mL of 0.05% RhoB was slowly added in, followed by diluted into 10mL. Both of absorption and emission spectra were done for this mixture, with the same parameters as for the standard solutions. Through the above equation set, the data and calculation results for 10 CdTe QDs samples with different synthesizing parameters are shown in Table S2.

**Table S2** Calculations of [Cd] and [Te] in CdTe QDs samples, T is the reaction temperature, t is the heating time, [Cd]<sub>i</sub> and [Te]<sub>i</sub> are the initial concentrations of Cd and Te before the starting of reaction, respectively, [Cd]<sub>e</sub> and [Te]<sub>e</sub> are the concentrations of Cd and Te in the samples obtained after microwave treatment and reaction with rhodamine-B respectively, [Cd]<sub>s</sub> and [Te]<sub>s</sub> are the concentrations of Cd and Te in CdTe QDs colloid before the microwave digestion, respectively.

| Sample                                | 1      | 2      | 3      | 4      | 5      | 6      | 7      | 8      | 9      | 10     |
|---------------------------------------|--------|--------|--------|--------|--------|--------|--------|--------|--------|--------|
| T./°C                                 | 140    | 140    | 140    | 140    | 100    | 120    | 160    | 140    | 140    | 140    |
| t /h                                  | 0.5    | 1      | 1.5    | 2      | 1      | 1      | 1      | 1      | 1      | 1      |
| [Cd] <sub>i</sub> /mM                 | 5      | 5      | 5      | 5      | 5      | 5      | 5      | 2.5    | 7.5    | 10     |
| [Te] <sub>i</sub> /mM                 | 1.25   | 1.25   | 1.25   | 1.25   | 1.25   | 1.25   | 1.25   | 1.25   | 1.25   | 1.25   |
| A                                     | 0.995  | 0.968  | 1.044  | 0.990  | 0.989  | 0.983  | 1.019  | 0.927  | 1.010  | 1.014  |
| Int                                   | 71.65  | 83.63  | 50.67  | 73.94  | 74.11  | 76.86  | 61.34  | 101.30 | 65.89  | 64.18  |
| [Cd] <sub>e</sub> /10 <sup>-6</sup> M | 15.226 | 12.330 | 20.169 | 14.762 | 14.723 | 14.104 | 17.788 | 8.061  | 16.397 | 16.824 |
| [Te] <sub>e</sub> /10 <sup>-6</sup> M | 6.028  | 6.061  | 6.094  | 5.952  | 5.950  | 5.916  | 5.937  | 6.107  | 6.222  | 6.204  |
| [Cd] <sub>s</sub> /mM                 | 3.0453 | 2.4660 | 4.0338 | 2.9524 | 2.9446 | 2.8208 | 3.5575 | 1.6122 | 3.2795 | 3.3648 |
| [Te] <sub>s</sub> /mM                 | 1.2056 | 1.2123 | 1.2188 | 1.1904 | 1.1900 | 1.1832 | 1.1874 | 1.2215 | 1.2444 | 1.2408 |

## Determination of the quantum yield (QY) of the CdTe QDs

To get the QY of CdTe QDs, Rhodamine 6G was employed as the reference. Rhodamine 6G was dissolved in water with the same molar concentration as tellurium in CdTe QDs colloid, and placed in the 1-cm quartz cuvette. Fluorescence spectra were collected between 480 and 800 nm at room temperature. The QY of CdTe QDs is calculated with the following equation:

$$\Phi_x = \Phi_r \left( \frac{Int_x}{Int_r} \right) \left( \frac{n_r^2}{n_x^2} \right) \quad (7)$$

where *Int* is the integral intensity of fluorescence peak, and *n* is the refractive index of the solution. The *x* and *r* subscripts refer to the detected sample and the reference, respectively. The QY of the reference rhodamine 6G is fixed at  $\Phi_r=95\%$  [Murray 1993], and the results are shown in Table S3.

**Table S3** Calculations of quantum yield for CdTe QDs samples, T is the reaction temperature, t is the heating time, [Cd]<sub>i</sub> and [Te]<sub>i</sub> are the initial concentrations of Cd and Te before the starting of reaction, respectively, [Cd]<sub>s</sub> and [Te]<sub>s</sub> are the concentrations of Cd and Te in detected CdTe QDs colloid samples, respectively. Int<sub>Rho6G</sub> and Int<sub>CdTe</sub> are the integral intensity of emissions for rhodamine 6G and CdTe QDs, respectively.

| Sample                | 1       | 2       | 3       | 4       | 5       | 6       | 7       | 8       | 9       | 10      |
|-----------------------|---------|---------|---------|---------|---------|---------|---------|---------|---------|---------|
| T./°C                 | 140     | 140     | 140     | 140     | 100     | 120     | 160     | 140     | 140     | 140     |
| t/h                   | 0.5     | 1       | 1.5     | 2       | 1       | 1       | 1       | 1       | 1       | 1       |
| [Cd] <sub>i</sub> /mM | 5       | 5       | 5       | 5       | 5       | 5       | 5       | 2.5     | 7.5     | 10      |
| [Te] <sub>i</sub> /mM | 1.25    | 1.25    | 1.25    | 1.25    | 1.25    | 1.25    | 1.25    | 1.25    | 1.25    | 1.25    |
| [Cd] <sub>s</sub> /mM | 3.0453  | 2.4660  | 4.0338  | 2.9524  | 2.9446  | 2.8208  | 3.5575  | 1.6122  | 3.2795  | 3.3648  |
| [Te] <sub>s</sub> /mM | 1.2056  | 1.2123  | 1.2188  | 1.1904  | 1.1900  | 1.1832  | 1.1874  | 1.2215  | 1.2444  | 1.2408  |
| Int <sub>Rho6G</sub>  | 50315.9 | 50478.8 | 50787.8 | 49639.2 | 49513.9 | 49075.4 | 49488.9 | 50725.2 | 51936.4 | 51786.1 |
| Int <sub>CdTe</sub>   | 21018.8 | 25131.3 | 22913.0 | 26640.1 | 4796.1  | 12994.9 | 15594.3 | 1591.9  | 51003.3 | 51003.3 |
| $\Phi_x$              | 39.68   | 47.29   | 42.85   | 50.98   | 9.20    | 25.16   | 29.93   | 2.98    | 93.29   | 93.57   |

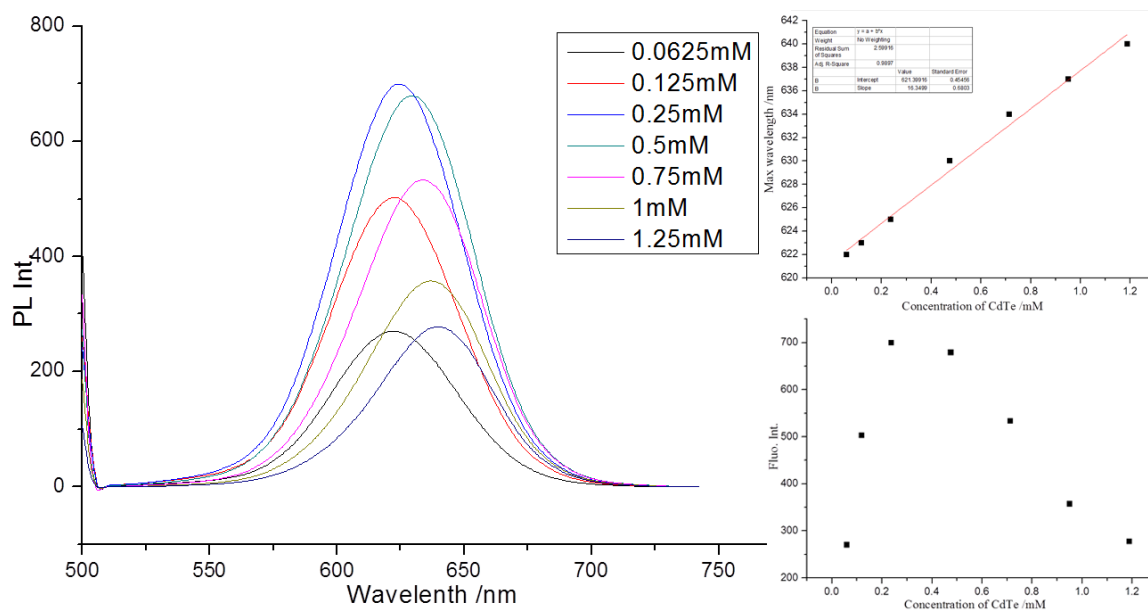

**Fig. S3** Emission spectra of CdTe QDs with different concentrations ( $\lambda_{ex}=500\text{nm}$ ) Fitting of the wavelength for max fluorescence intensity as a function of the CdTe concentration and changes of fluorescence intensity with increasing the CdTe concentration.





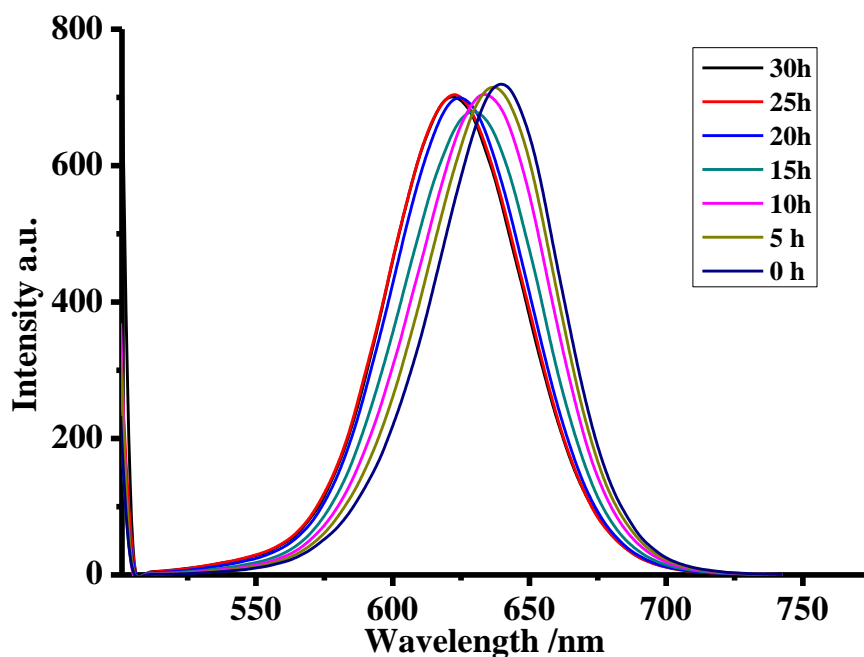

**Fig. S6** Photo-stability of as-prepared CdTe QDs ( $\lambda_{\text{ex}}=500$  nm)

**References:**

Kim H.N., Ren W.X., Kim J.S., et al. Fluorescent and colorimetric sensors for detection of lead, cadmium, and mercury ions. *Chem. Soc. Rev.* 2012, **41**: 3210-3244.

Murray C.B., Norris D.J., Bawendi M.G., Synthesis and characterization of nearly monodisperse CdE (E= sulfur, selenium, tellurium) semiconductor nanocrystallites. *J. Am. Chem. Soc.* 1993, **115**: 8706-8715.

Rao T.P., Ramakrishna T.V., Selective extractive separation of zinc, cadmium and lead from iodide media with mesityl oxide. *Analyst* 1982, **107**: 704-707.

Talio M.C., Luconi M.O., Masi A.N., et al. Direct Cadmium Monitoring in Cigarette Filters Leachate by Molecular Fluorescence. *J. Environ. Prot.* 2012, **3**: 187-193.
